# Supplementary material for: Baseline gene expression in subcutaneous adipose tissue predicts diet-induced weight loss in individuals with obesity
Source: PeerJ journal article supplement (doi:10.7717/peerj.15100), 2023-03-24
Supplement: Supplemental_Figure_S1.pdf [file Supplemental_Figure_S1.pdf]

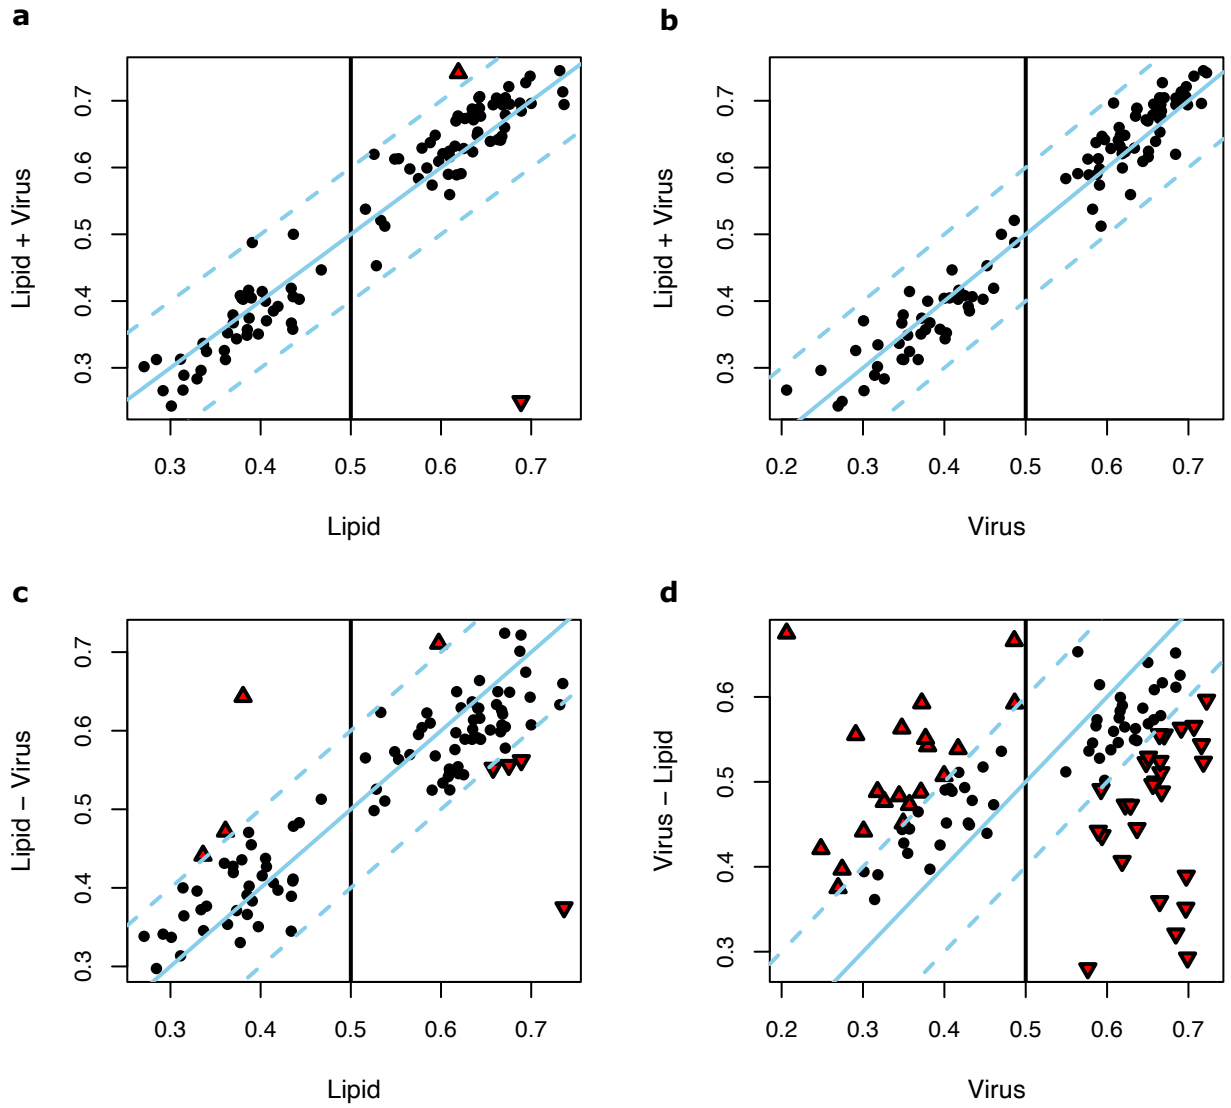

**Supplemental figure S1: Merging and subtracting parameters of Lipid and Virus models.**
