# Supplementary material for: Baseline gene expression in subcutaneous adipose tissue predicts diet-induced weight loss in individuals with obesity
Source: PeerJ journal article supplement (doi:10.7717/peerj.15100), 2023-03-24
Supplement: Supplemental_Figure_S2.pdf [file Supplemental_Figure_S2.pdf]

**a**

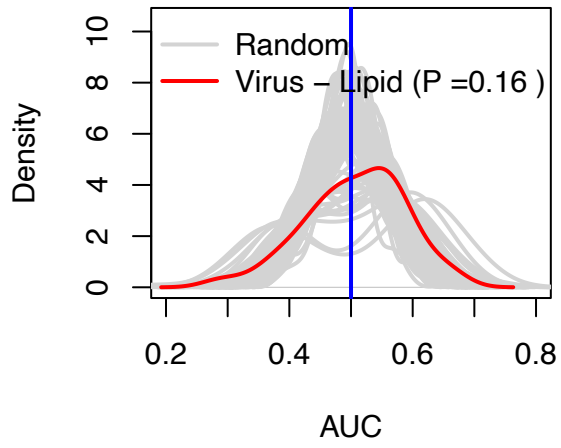

**b**

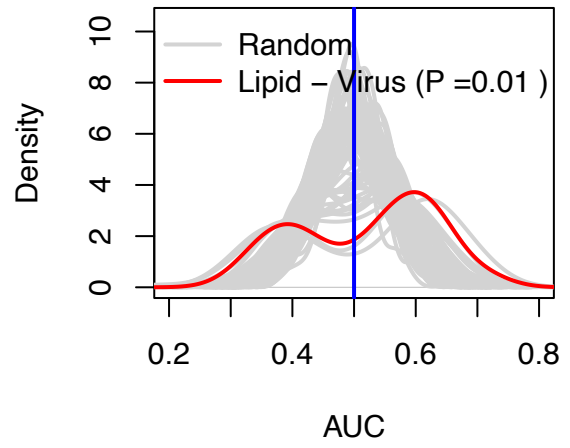

**Supplemental figure S2: Performance of Virus – Lipid and Lipid – Virus models.**
