# Supplementary material for: Baseline gene expression in subcutaneous adipose tissue predicts diet-induced weight loss in individuals with obesity
Source: PeerJ journal article supplement (doi:10.7717/peerj.15100), 2023-03-24
Supplement: Supplemental_Figure_S3.pdf [file Supplemental_Figure_S3.pdf]

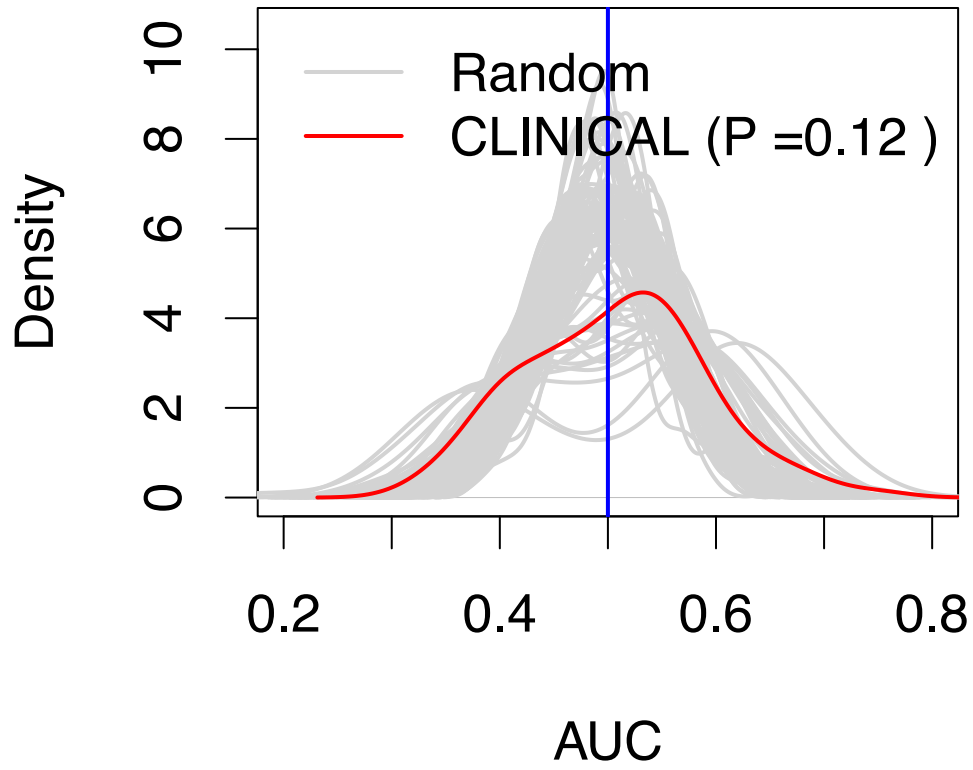

**Supplemental figure S3: Performance of the prediction models based on baseline anthropometric and clinical factors.**
